# Supplementary material
Source: Springer Nature journal article supplement (https://www.springermedizin.de/resource/supplementary/12943_2003_46_MOESM10_ESM.pdf/9553318)

CAT activity

Panc-1

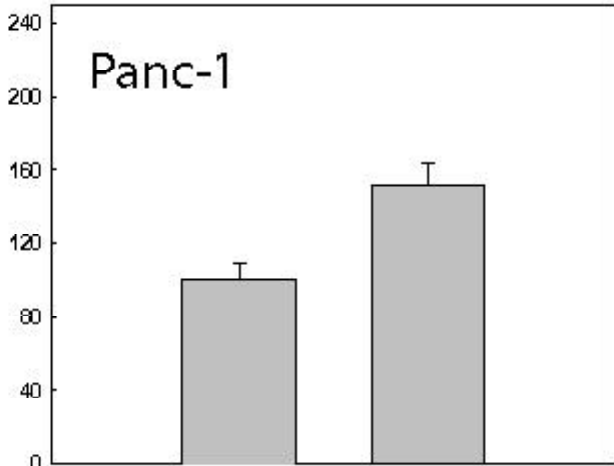

CAT activity

BxPc-3

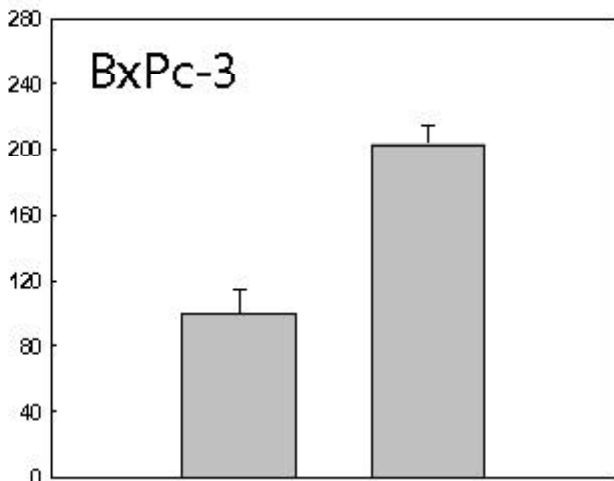

p8-CAT  
p38

+

+

+

Supplement: MOESM10 [file 9553318]
